# Supplementary material for: On the Relationship between P3 Latency and Mental Ability as a Function of Increasing Demands in a Selective Attention Task
Source: MDPI journal article supplement (doi:10.3390/brainsci9020028), 2019-01-29
Supplement: s1 [file s1]

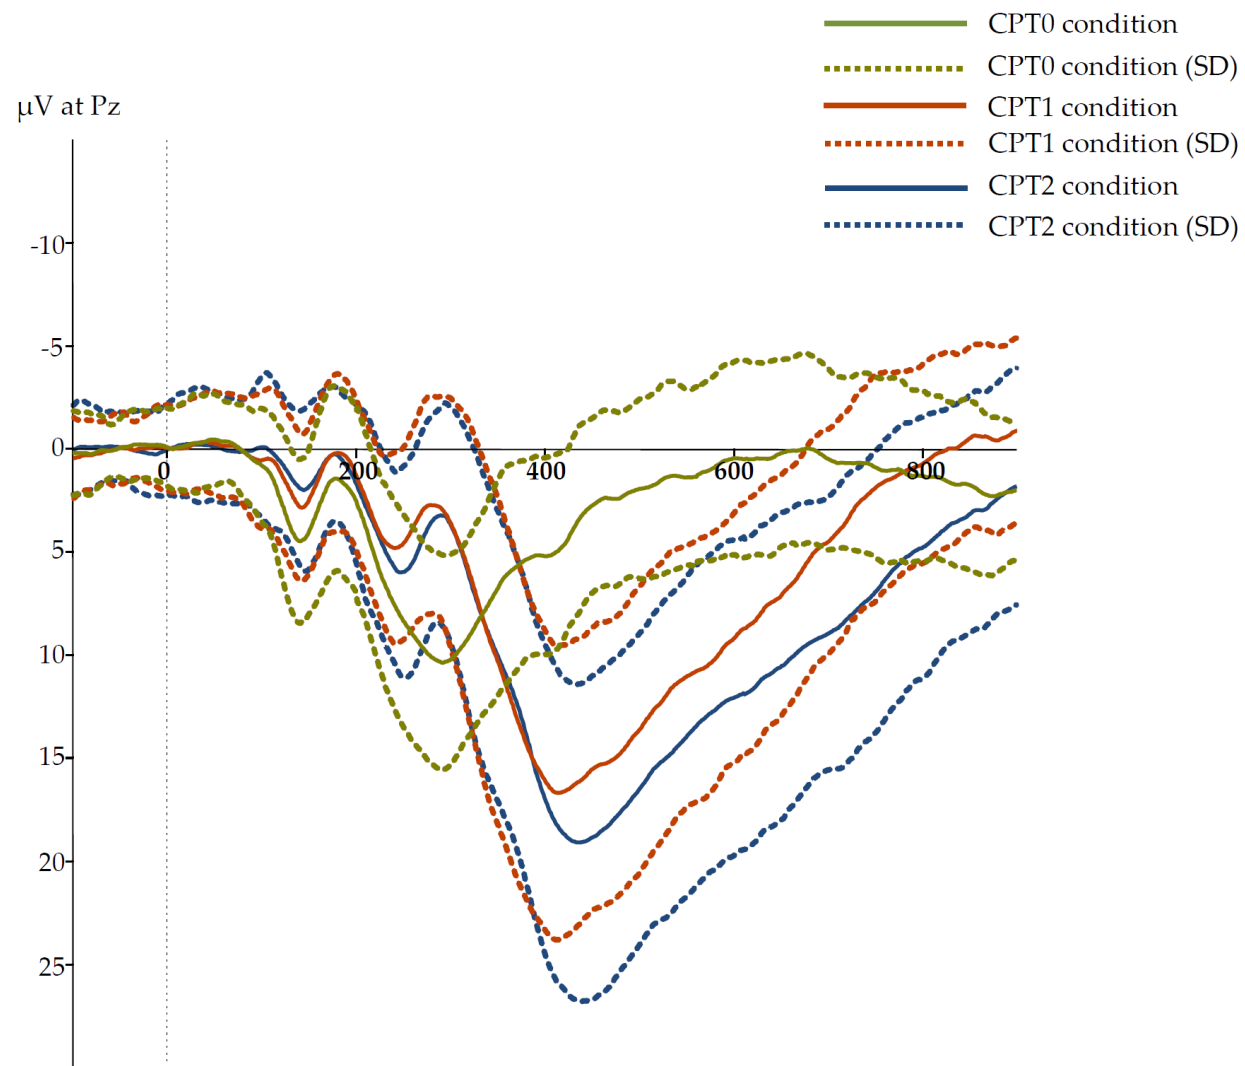

**Figure S1.** Grand averages (solid lines) and standard deviations (dotted lines) of the event-related potentials in the three CPT conditions.

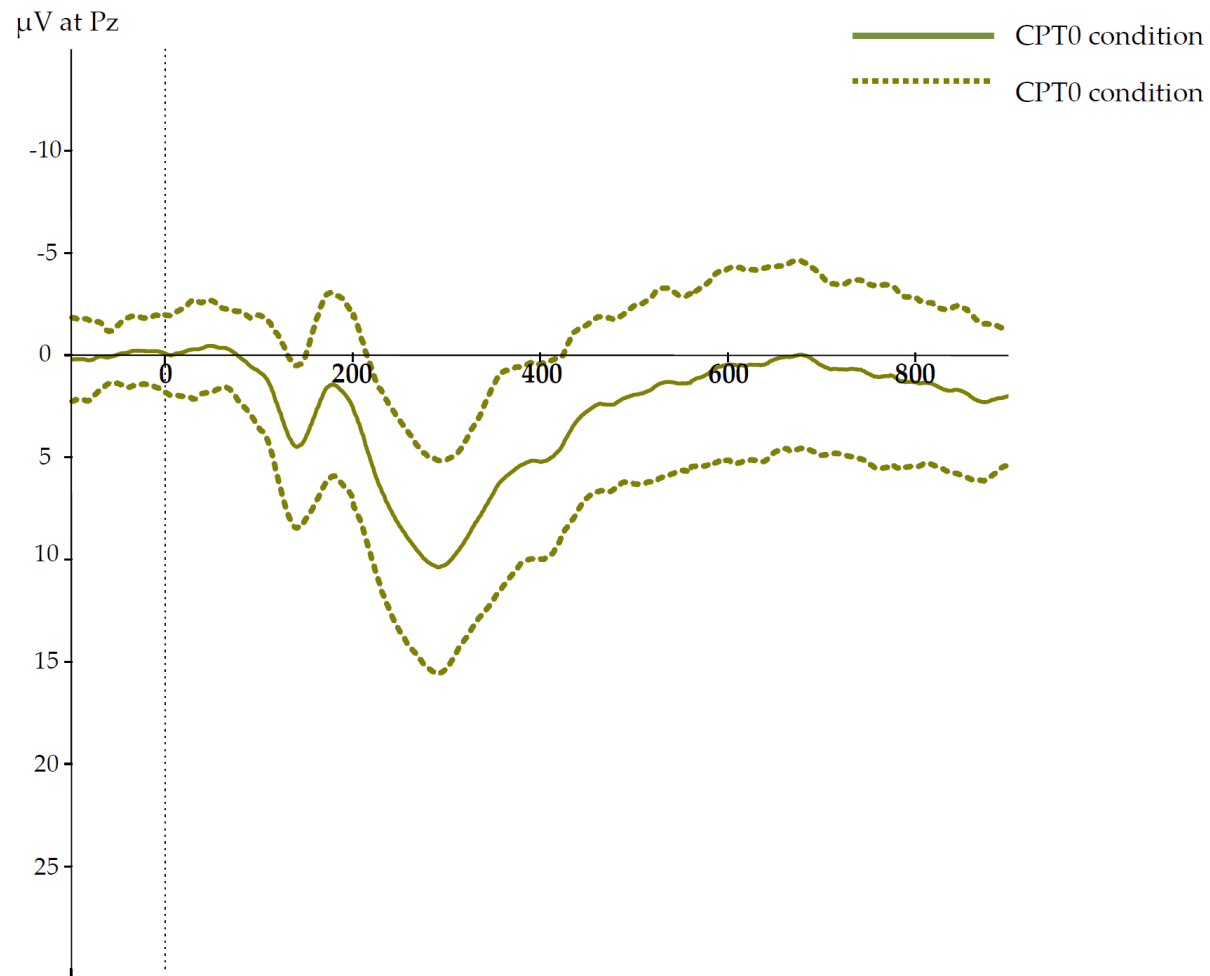

**Figure S2.** Grand average (solid line) and standard deviation (dotted line) of the event-related potentials in the CPT0 condition.

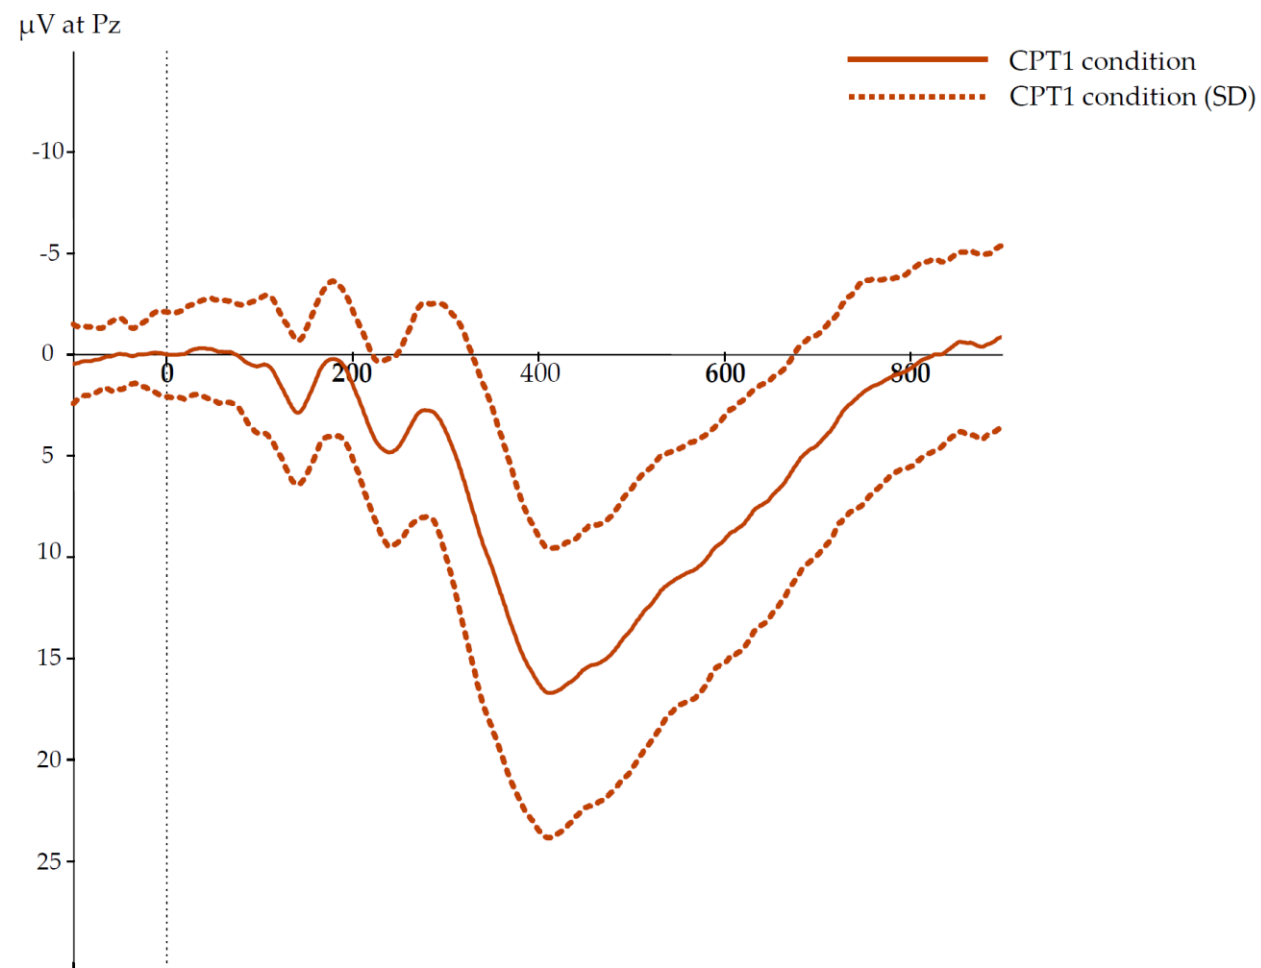

**Figure S3.** Grand average (solid line) and standard deviation (dotted line) of the event-related potentials in the CPT1 condition.

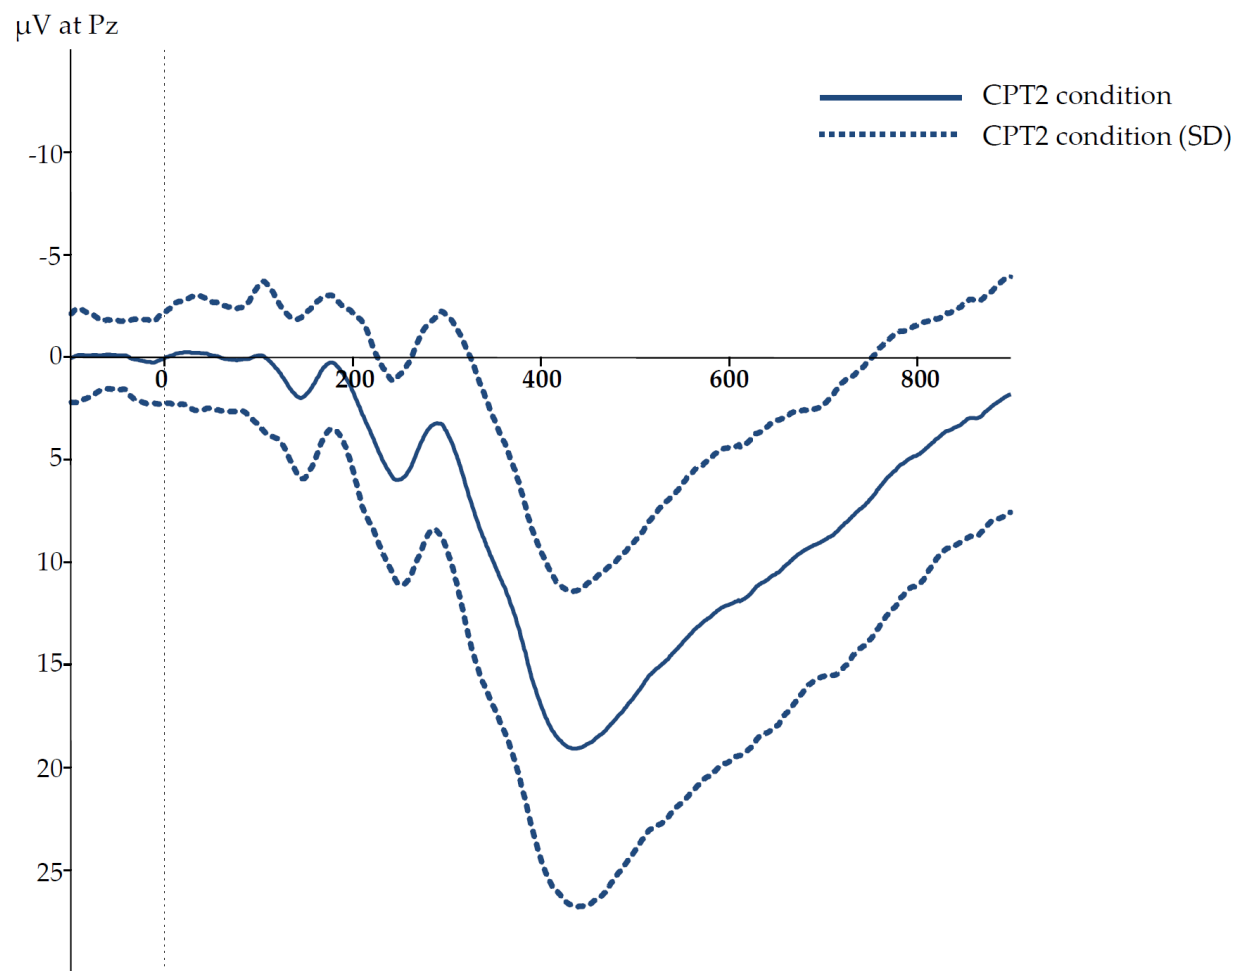

**Figure S4.** Grand average (solid line) and standard deviation (dotted line) of the event-related potentials in the CPT2 condition.
